# Supplementary material for: Toxoplasma gondii-altered host behaviour: elucidating the role of parasite-produced dopamine
Source: Research Square preprint supplement (doi:10.21203/rs.3.rs-6907511/v1), 2025-07-03
Supplement: Supplementary file 1 [file 0b3c6fe71699f003a607da7d.docx]

**Supplementary Information**

**Table S1.** Number of rats examined per round by experimental line.

| Line | Round 1 | Round 2 | Round 3 |
| --- | --- | --- | --- |
| Control | 12 | 6 | 6 |
| WT | 12 |  | 11 |
| *Tg*TH0 |  | 12 |  |
| *Tg*TH-MID |  | 11 |  |
| *Tg*TH-HIGH |  |  | 15 |

**Table S2.** Number of rats of each sex examined by experimental line.

| Line | Male | Female |
| --- | --- | --- |
| Control | 12 | 12 |
| WT | 11 | 12 |
| *Tg*TH0 | 6 | 6 |
| *Tg*TH-MID | 5 | 6 |
| *Tg*TH-HIGH | 7 | 8 |


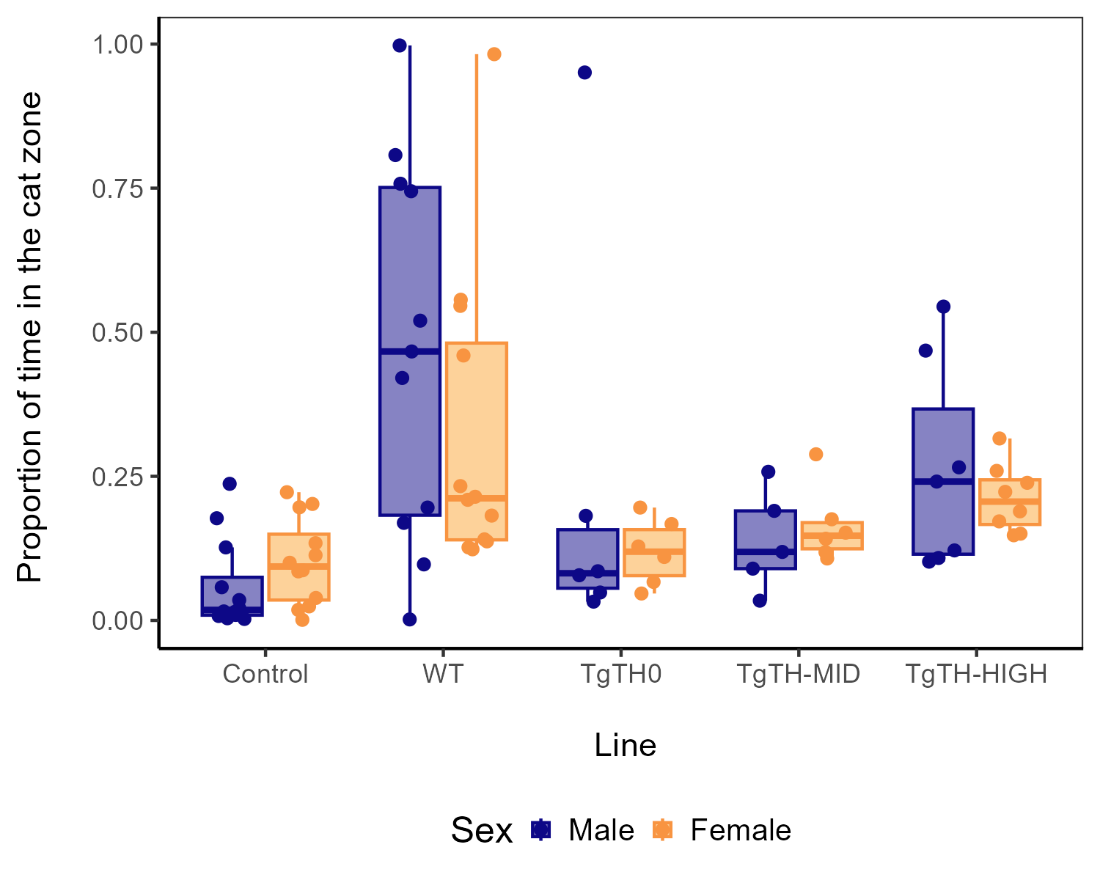


**Figure S1.** Proportion of time spent in the cat zone. Distribution of the observations by line and sex.

**Table S3**. Proportion of time spent in the cat zone. Posterior means and 95% credible intervals (CrIs; see Figure 2).

| Line | Mean | 95% CrI lower limit | 95% CrI upper limit |
| --- | --- | --- | --- |
| Control | 0.084 | 0.054 | 0.128 |
| WT | 0.443 | 0.324 | 0.571 |
| *Tg*TH0 | 0.107 | 0.075 | 0.153 |
| *Tg*TH-MID | 0.155 | 0.111 | 0.209 |
| *Tg*TH-HIGH | 0.243 | 0.185 | 0.315 |

**Table S4**. Proportion of time spent in the cat zone. Posterior mean differences between lines and 95% credible intervals (CrIs; see Figure 2). Differences whose 95% credible interval does not include the value of zero are considered relevant and are highlighted in grey.

| Lines | Mean | 95% CrI lower limit | 95% CrI upper limit |
| --- | --- | --- | --- |
| Control - *Tg*TH0 | -0.023 | -0.079 | 0.031 |
| Control - *Tg*TH-MID | -0.071 | -0.134 | -0.009 |
| Control - *Tg*TH-HIGH | -0.159 | -0.238 | -0.088 |
| TgTH0 - *Tg*TH-MID | -0.048 | -0.113 | 0.012 |
| TgTH0 - *Tg*TH-HIGH | -0.136 | -0.213 | -0.065 |
| TgTH-MID - *Tg*TH-HIGH | -0.088 | -0.170 | -0.010 |
| WT - Control | 0.359 | 0.235 | 0.489 |
| WT - *Tg*TH0 | 0.336 | 0.210 | 0.464 |
| WT - *Tg*TH-MID | 0.288 | 0.160 | 0.420 |
| WT - *Tg*TH-HIGH | 0.200 | 0.067 | 0.339 |


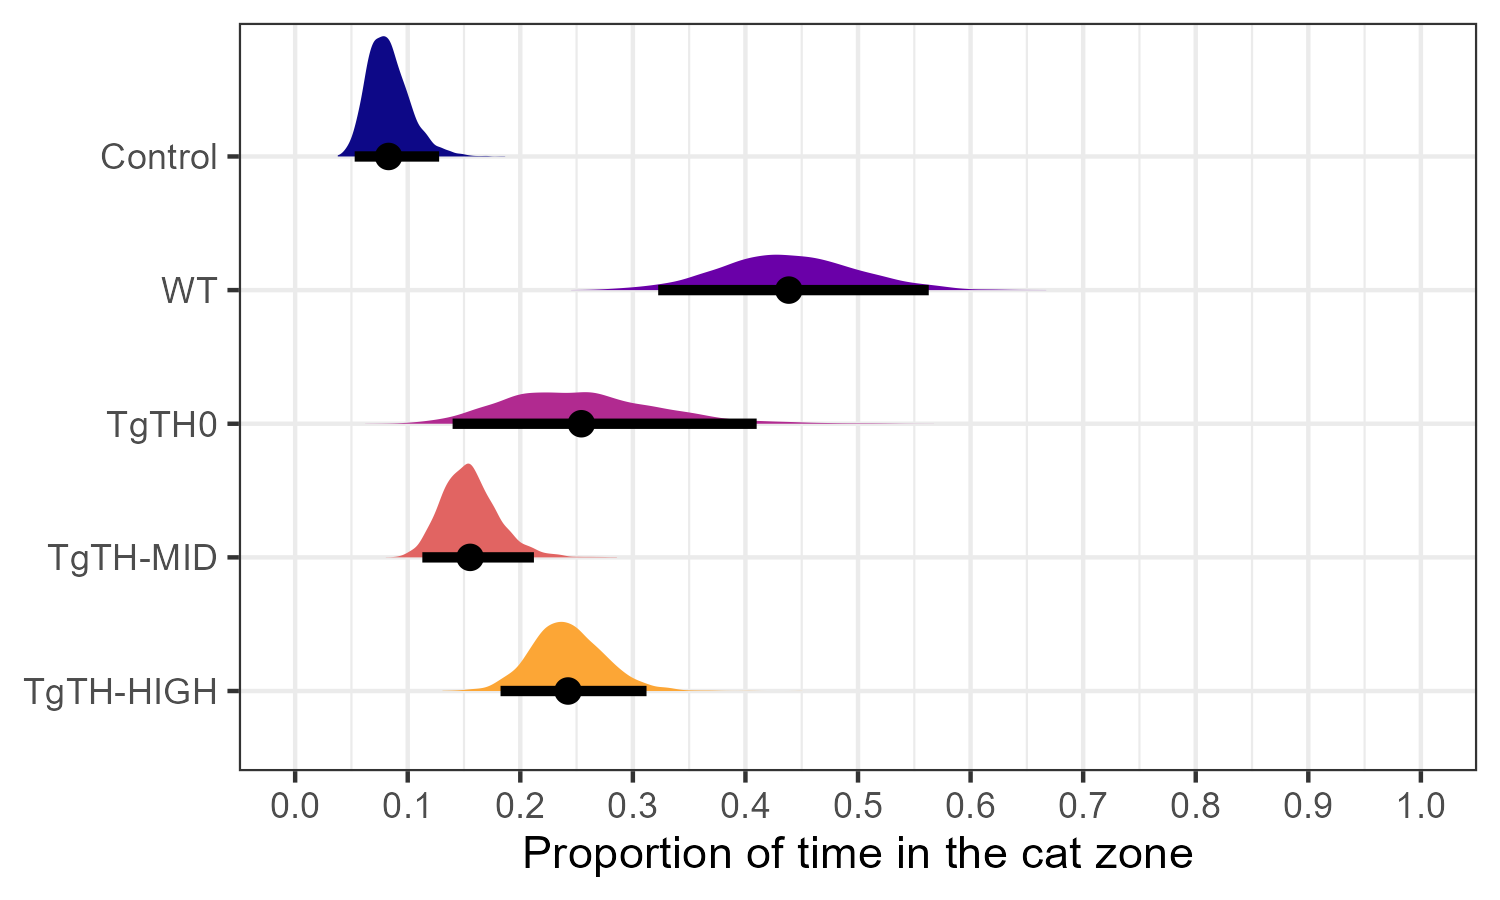


**Figure S2.** Proportion of time spent in the cat zone (including the extreme value). Posterior distributions of the mean and 95% credible intervals, by experimental line.

**
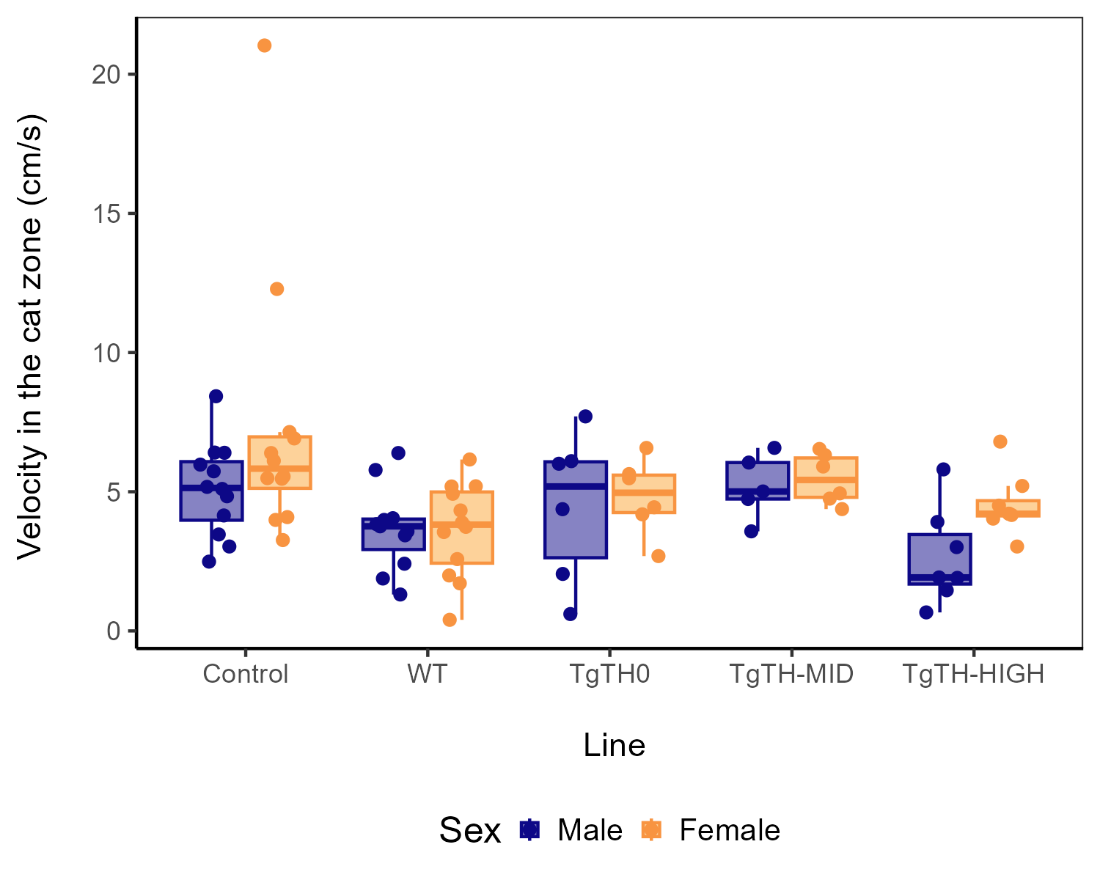
**

**Figure S3.** Velocity (cm/s) in the cat zone. Distribution of the observations by line and sex.

**Table S5.** Velocity (cm/s) in the cat zone. Posterior means and 95% credible intervals (CrIs; see Figure 3).

| Line | Mean | 95% CrI lower limit | 95% CrI upper limit |
| --- | --- | --- | --- |
| Control | 5.412 | 4.720 | 6.092 |
| WT | 3.668 | 2.966 | 4.377 |
| *Tg*TH0 | 4.760 | 3.711 | 5.786 |
| *Tg*TH-MID | 5.343 | 4.391 | 6.276 |
| *Tg*TH-HIGH | 3.677 | 2.804 | 4.507 |

**Table S6.** Velocity (cm/s) in the cat zone. Posterior mean differences between lines and 95% credible intervals (CrIs; see Figure 3). Differences whose 95% credible interval does not include the value of zero are considered relevant and are highlighted in grey.

| Lines | Mean | 95% CrI lower limit | 95% CrI upper limit |
| --- | --- | --- | --- |
| Control - *Tg*TH0 | 0.652 | -0.583 | 1.895 |
| Control - *TgTH*-MID | 0.069 | -1.120 | 1.256 |
| Control - *Tg*TH-HIGH | 1.735 | 0.663 | 2.838 |
| TgTH0 - *Tg*TH-MID | -0.583 | -1.986 | 0.842 |
| TgTH0 - *Tg*TH-HIGH | 1.083 | -0.212 | 2.467 |
| TgTH-MID - *Tg*TH-HIGH | 1.666 | 0.359 | 2.927 |
| WT - Control | -1.744 | -2.758 | -0.731 |
| WT - *Tg*TH0 | -1.092 | -2.349 | 0.162 |
| WT - *Tg*TH-MID | -1.675 | -2.823 | -0.520 |
| WT - *Tg*TH-HIGH | -0.009 | -1.106 | 1.103 |


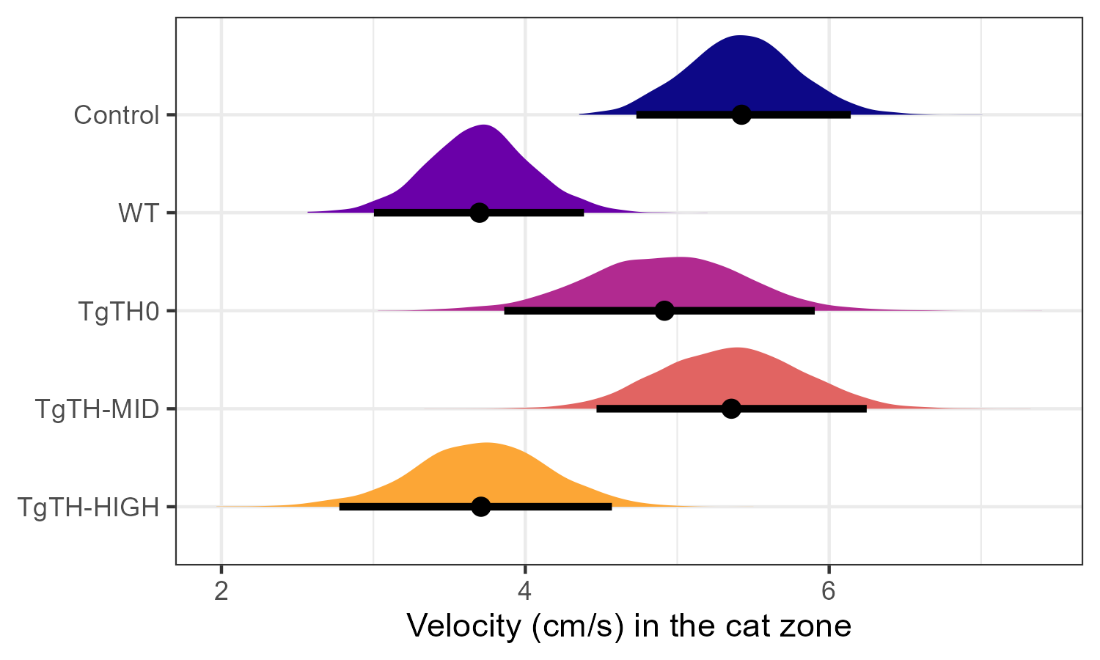


**Figure S4.** Velocity in the cat zone (including extreme value). Posterior distributions of the mean and 95% credible intervals, by experimental line.

**
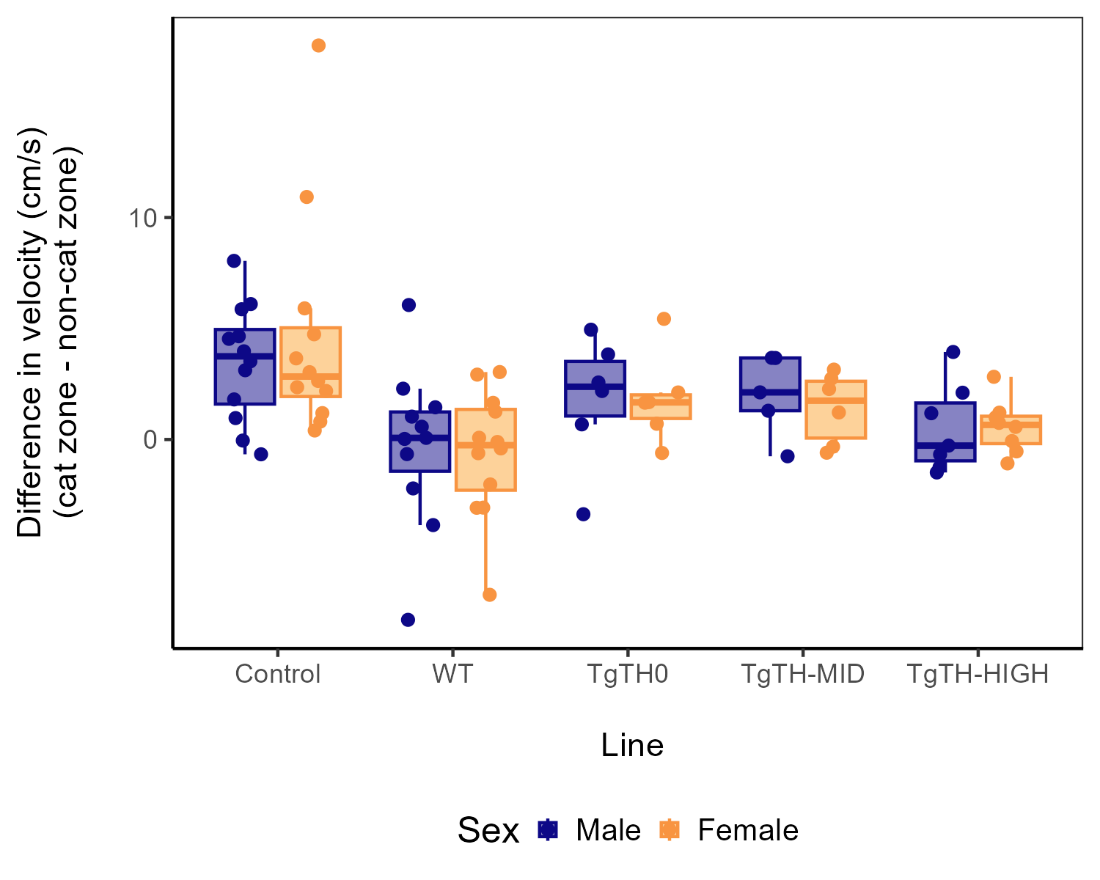
**

**Figure S5.** Distribution of observations for difference in velocity (cm/s) between the cat zone and the non-cat zone (cat zone – non-cat zone) by line and sex.

**Table S7.** Difference in velocity (cm/s) in the cat zone and non-cat zone (cat zone – non-cat zone). Posterior means and 95% credible intervals (CrIs; see Figure 4).

| Line | Mean | 95% CrI lower limit | 95% CrI upper limit |
| --- | --- | --- | --- |
| Control | 3.309 | 2.247 | 4.414 |
| WT | -0.159 | -1.213 | 0.862 |
| *Tg*TH0 | 1.917 | 0.518 | 3.327 |
| *Tg*TH-MID | 1.749 | 0.344 | 3.116 |
| *Tg*TH-HIGH | 0.474 | -0.636 | 1.631 |

**Table S8.** Difference in velocity (cm/s) in the cat zone and non-cat zone (cat zone – non-cat zone). Posterior mean differences between lines and 95% credible intervals (CrIs; see Figure 4). Differences whose 95% credible interval does not include the value of zero are considered relevant and are highlighted in grey.

| Lines | Mean | 95% CrI lower limit | 95% CrI upper limit |
| --- | --- | --- | --- |
| Control - *Tg*TH0 | 1.393 | -0.361 | 3.192 |
| Control - *Tg*TH-MID | 1.561 | -0.167 | 3.339 |
| Control - *Tg*TH-HIGH | 2.835 | 1.252 | 4.413 |
| TgTH0 - *Tg*TH-MID | 0.168 | -1.807 | 2.138 |
| TgTH0 - *Tg*TH-HIGH | 1.442 | -0.345 | 3.192 |
| TgTH-MID - *Tg*TH-HIGH | 1.274 | -0.575 | 3.047 |
| WT - Control | -3.468 | -5.029 | -2.003 |
| WT - *Tg*TH0 | -2.076 | -3.799 | -0.365 |
| WT - *Tg*TH-MID | -1.908 | -3.653 | -0.192 |
| WT - *Tg*TH-HIGH | -0.633 | -2.191 | 0.880 |


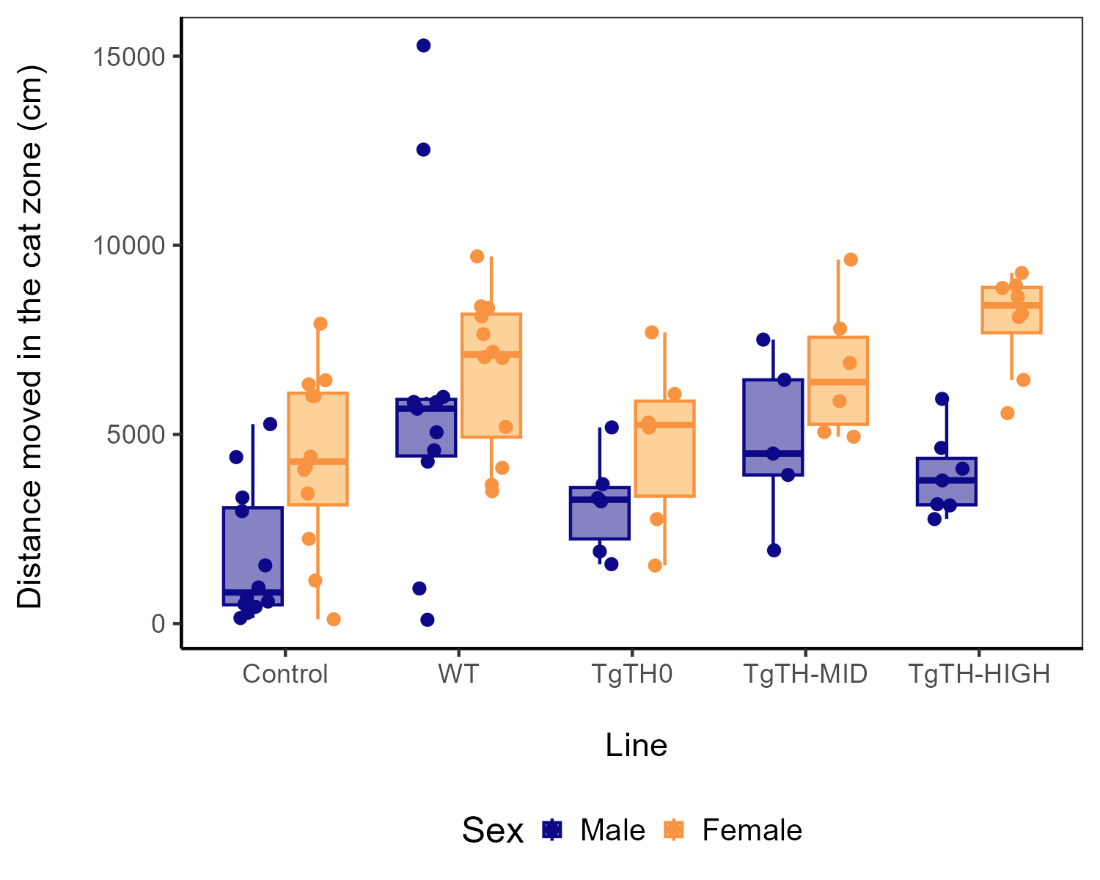


**Figure S6.** Distance (cm) moved in the cat zone. Distribution of the observations, by line and sex.

**Table S9.** Distance (cm) moved in the cat zone. Posterior means and 95% credible intervals (CrIs; see Figure 5).

| Sex | Line | Mean | 95% CrI lower limit | 95% CrI upper limit |
| --- | --- | --- | --- | --- |
| Male | Control | 1,796.614 | 807.409 | 2,801.757 |
| Female | Control | 4,261.909 | 3,252.688 | 5,232.110 |
| Male | WT | 4,747.165 | 3,687.648 | 5,812.523 |
| Female | WT | 7,212.460 | 6,161.477 | 8,239.566 |
| Male | *Tg*TH0 | 2,798.066 | 1,478.664 | 4,117.265 |
| Female | *Tg*TH0 | 5,263.361 | 3,925.289 | 6,605.784 |
| Male | *Tg*TH-MID | 4,457.514 | 3,101.459 | 5,797.528 |
| Female | *Tg*TH-MID | 6,922.809 | 5,592.463 | 8,271.264 |
| Male | *Tg*TH-HIGH | 4,789.745 | 3,635.757 | 6,000.124 |
| Female | *Tg*TH-HIGH | 7,255.040 | 6,045.978 | 8,407.114 |

**Table S10.** Distance (cm) moved in the cat zone. Posterior mean differences between lines and 95% credible intervals (CrIs; see Figure 5). Differences whose 95% credible interval does not include the value of zero are considered relevant and are highlighted in grey.

| Sex | Lines | Mean | 95% CrI lower limit | 95% CrI upper limit |
| --- | --- | --- | --- | --- |
| Male | Control - *Tg*TH0 | -1,001 | -2,544 | 492 |
| Male | Control - *Tg*TH-MID | -2,661 | -4,205 | -1,175 |
| Male | Control - *Tg*TH-HIGH | -2,993 | -4,339 | -1,608 |
| Male | WT - Control | 2,951 | 1,708 | 4,209 |
| Male | *Tg*TH0 - *Tg*TH-MID | -1,659 | -3,435 | 88 |
| Male | *Tg*TH0 - *Tg*TH-HIGH | -1,992 | -3,650 | -342 |
| Male | *Tg*TH-MID - *Tg*TH-HIGH | -332 | -1,988 | 1,307 |
| Male | WT - *Tg*TH0 | 1,949 | 342 | 3,497 |
| Male | WT - *Tg*TH-MID | 290 | -1,276 | 1,824 |
| Male | WT - *Tg*TH-HIGH | -43 | -1,472 | 1,384 |
| Female | Control - *Tg*TH0 | -1,001 | -2,544 | 492 |
| Female | Control - *Tg*TH-MID | -2,661 | -4,205 | -1,175 |
| Female | Control - *Tg*TH-HIGH | -2,993 | -4,339 | -1,608 |
| Female | WT - Control | 2,951 | 1,708 | 4,209 |
| Female | *Tg*TH0 - *TgTH*-MID | -1,659 | -3,435 | 88 |
| Female | *Tg*TH0 - *Tg*TH-HIGH | -1,992 | -3,650 | -342 |
| Female | *Tg*TH-MID - *Tg*TH-HIGH | -332 | -1,988 | 1,307 |
| Female | WT - *Tg*TH0 | 1,949 | 342 | 3,497 |
| Female | WT - *Tg*TH-MID | 290 | -1,276 | 1,824 |
| Female | WT - *Tg*TH-HIGH | -43 | -1,472 | 1,384 |


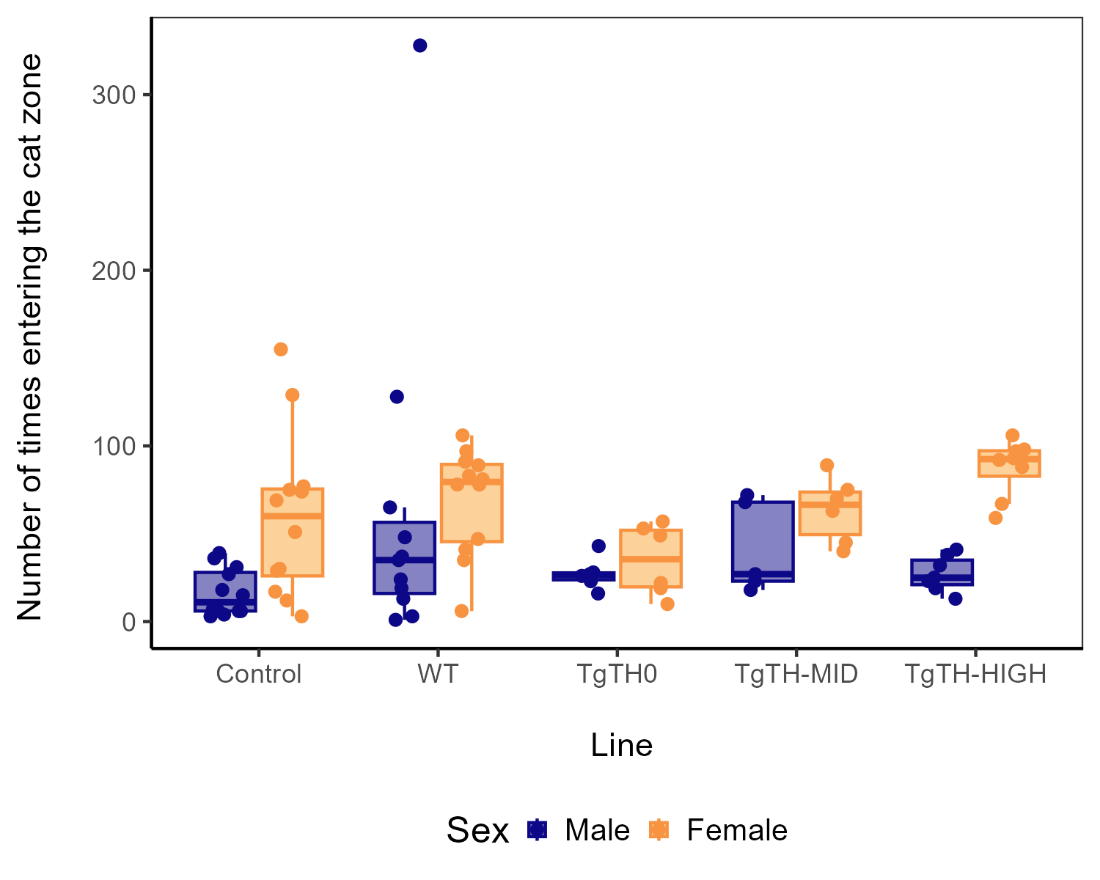


**Figure S7.** Frequency to enter the cat zone. Distribution of the observations, by line and sex.

**Table S11.** Frequency of entering the cat zone. Posterior means and 95% credible intervals (CrIs; see Figure 6).

| Sex | Mean | 95% CrI lower limit | 95% CrI upper limit |
| --- | --- | --- | --- |
| Male | 28.766 | 22.989 | 35.911 |
| Female | 65.530 | 52.671 | 81.493 |

**Table S12.** Frequency of entering the cat zone. Posterior mean difference between lines and 95% credible interval (CrI; see Figure 6). Differences whose 95% credible interval does not include the value of zero are considered relevant and are highlighted in grey.

| Sex | Mean | 95% CrI lower limit | 95% CrI upper limit |
| --- | --- | --- | --- |
| Female -Male | 36.764 | 21.879 | 54.261 |


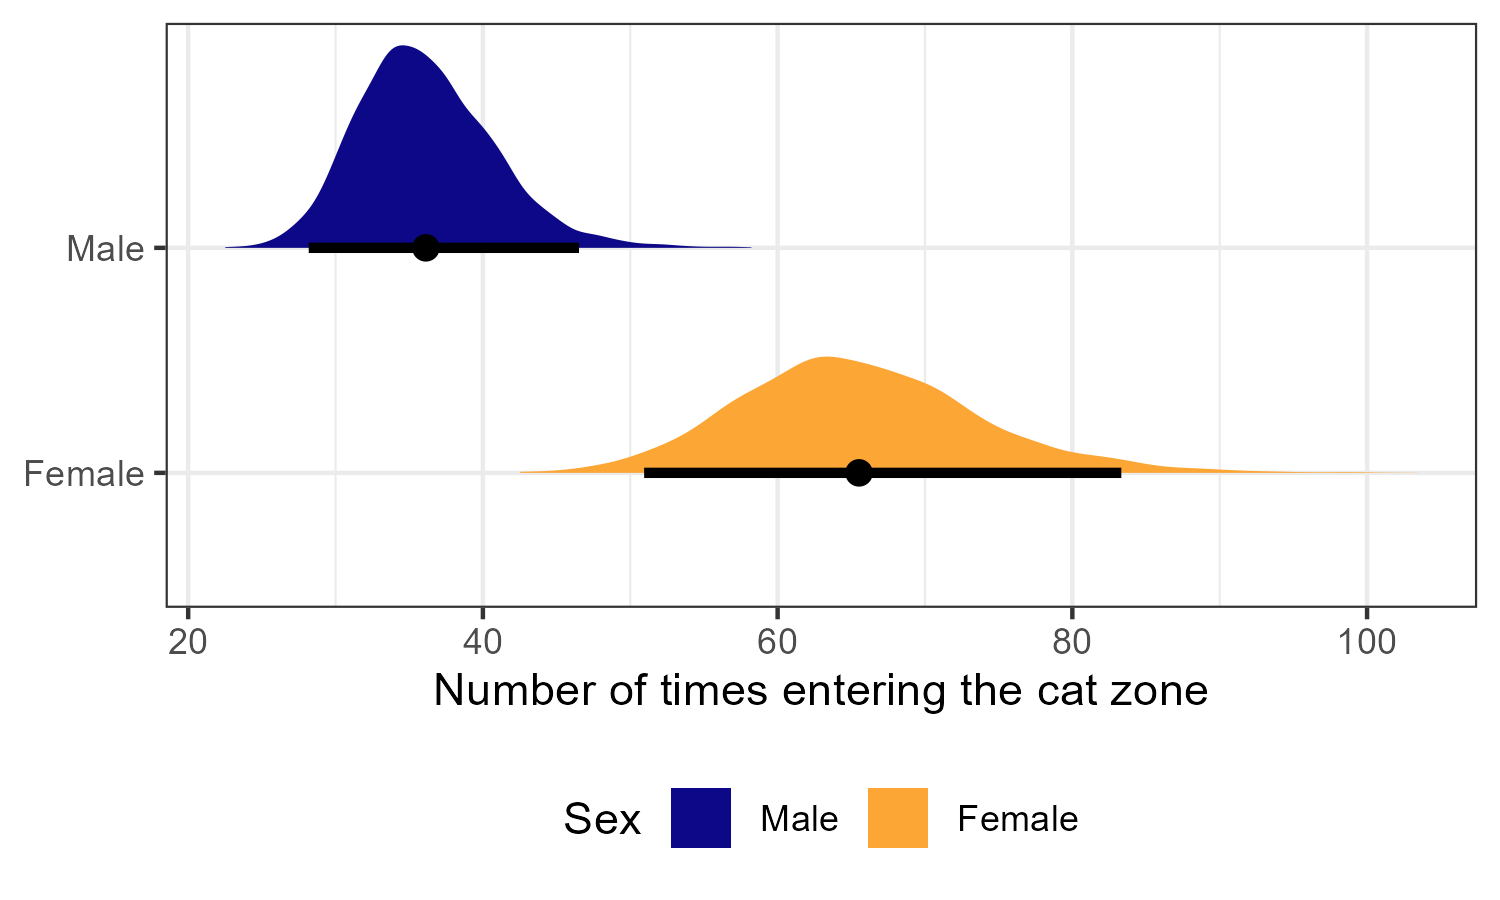


**Figure S8.** Frequency to enter the cat zone (including the extreme value). Posterior distribution of the means and 95% credible intervals, by sex.
